# Supplementary material for: Ultra-Performance Liquid Chromatography-Ion Mobility Separation-Quadruple Time-of-Flight MS (UHPLC-IMS-QTOF MS) Metabolomics for Short-Term Biomarker Discovery of Orange Intake: A Randomized, Controlled Crossover Study
Source: PubMed Central journal article supplement (PMC7400617; doi:10.3390/nu12071916), 2020-06-29

# **Ultra-Performance Liquid Chromatography-Ion Mobility Separation-Quadruple Time-of-Flight MS (UHPLC-IMS-QTOF MS) Metabolomics for Short-Term Biomarker Discovery of Orange Intake: A Randomized, Controlled Crossover Study**

Leticia Lacalle-Bergeron, Tania Portolés, Francisco J. López, Juan Vicente Sancho, Carolina Ortega-Azorín, Eva M. Asensio, Oscar Coltell and Dolores Corella

|                |   |
|----------------|---|
| Figure S1..... | 2 |
| Figure S2..... | 3 |
| Figure S3..... | 4 |
| Figure S4..... | 5 |
| Figure S5..... | 6 |
| Figure S6..... | 7 |

**Figure S1.** PCA score plot component 1 vs component 2 of HILIC in negative ionization mode, explaining the 41.8% and 14.7% of the variance, respectively. The purple points (14 QC samples) are grouped and centered in the plot. 4 plasma samples were obtained from each of the 30 participants, obtaining 30 samples per group. 120 plasma samples were analyzed in total. The samples obtained at t = 0 h and t = 4 h after the intake of an isocaloric beverage (IB) and the samples obtained at t = 0 h and t = 4 h after orange intake are colored in green, blue, black and orange, respectively.

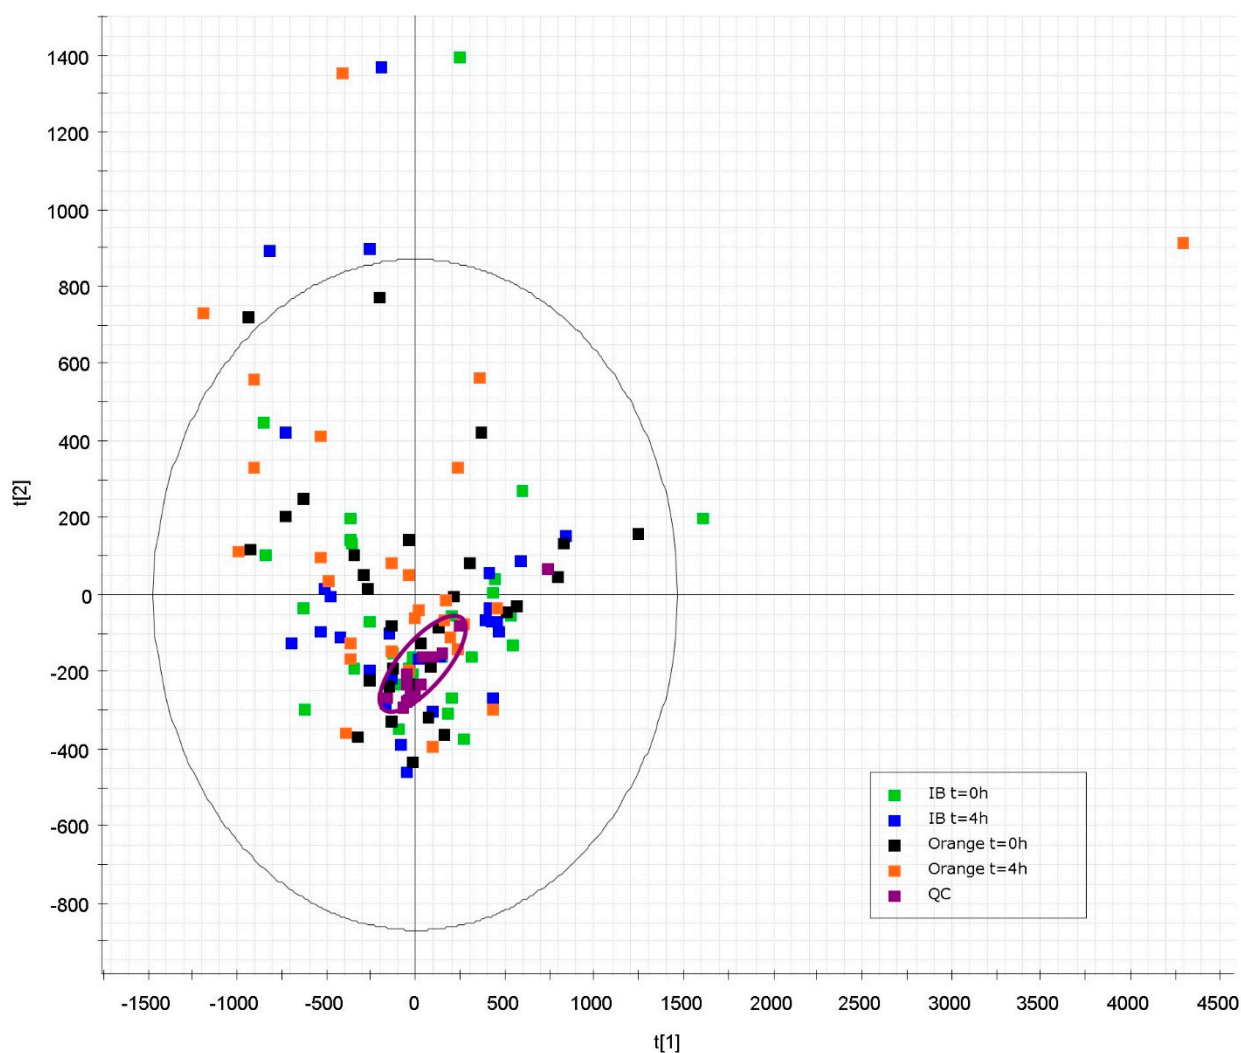

**Figure S2.** PCA score plot component 1 vs component 2 of RP in positive ionization mode, explaining the 47.1% and 11.7% of the variance, respectively. The purple points (14 QC samples) are grouped and centered in the plot. 4 plasma samples were obtained from each of the 30 participants, obtaining 30 samples per group. 120 plasma samples were analyzed in total. The samples obtained at t = 0 h and t = 4 h after the intake of an isocaloric beverage (IB) and the samples obtained at t = 0 h and t = 4 h after orange intake are colored in green, blue, black and orange, respectively.

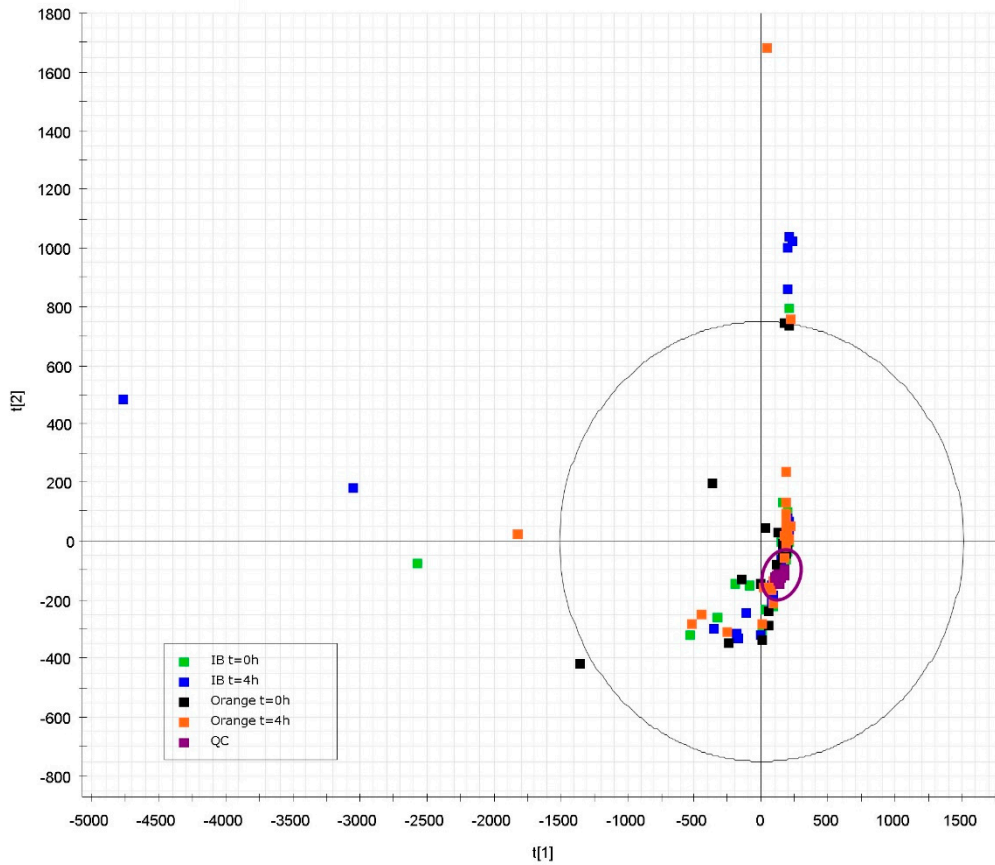

**Figure S3.** PCA score plot component 1 vs component 2 of RP in negative ionization mode, explaining the 28.5% and 26.7% of the variance, respectively. The purple points (14 QC samples) are grouped and centered in the plot. 4 plasma samples were obtained from each of the 30 participants, obtaining 30 samples per group. 120 plasma samples were analyzed in total. The samples obtained at  $t = 0$  h and  $t = 4$  h after the intake of an isocaloric beverage (IB) and the samples obtained at  $t = 0$  h and  $t = 4$  h after orange intake are colored in green, blue, black and orange, respectively.

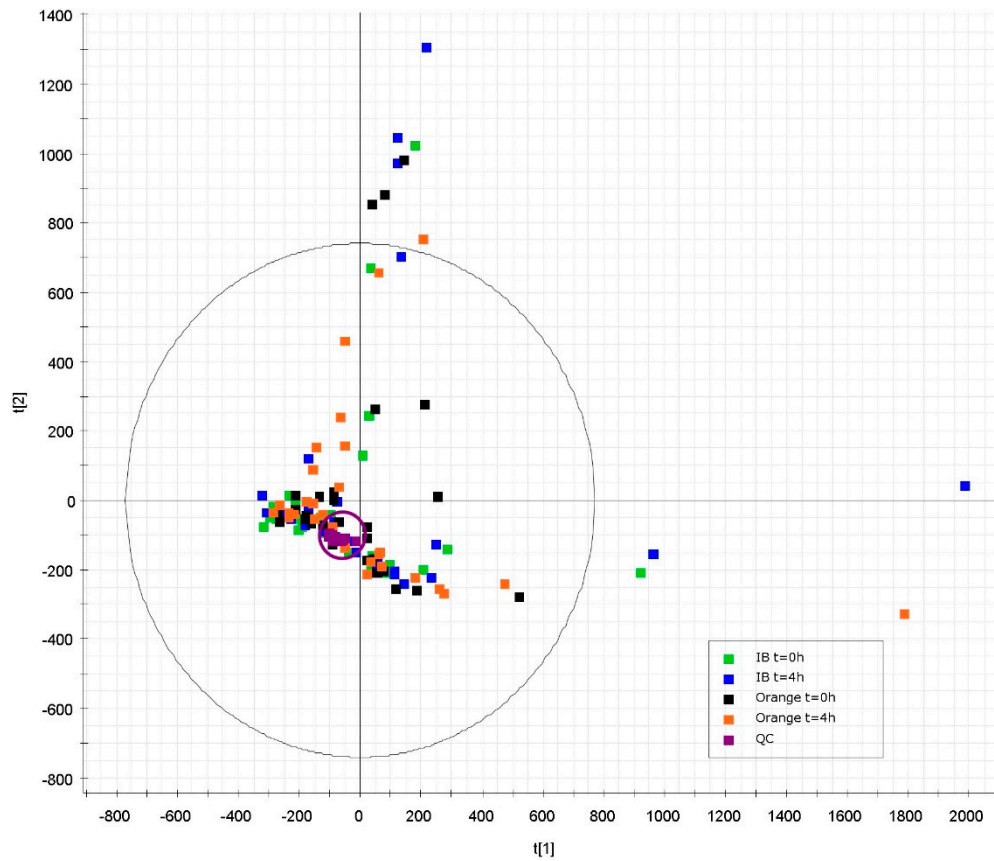

**Figure S4.** OPLS-DA score plot based on the features with repeated measures ANOVA  $p$ -value  $\leq 0.05$ , where the 94% of the total variance is explained. The samples obtained at  $t = 0$  h and  $t = 4$  h after the intake of an isocaloric beverage (IB) and the samples obtained at  $t = 0$  h are marked as “others” group and colored in black; while samples obtained  $t = 4$  h after orange intake are colored in orange.

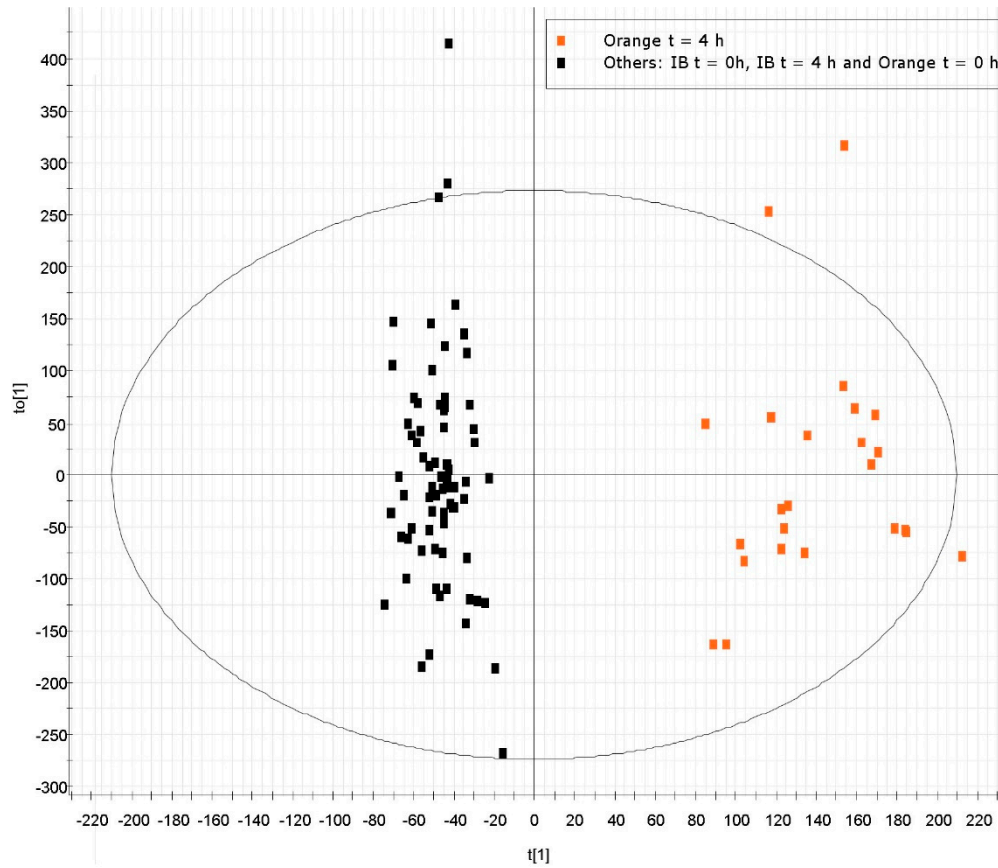

**Figure S5.** PCA score plot component 1 vs component 2 obtained with the 43 features highlighted in the OPLS-DA with a  $P[\text{corr}] \geq |0.6|$ , explaining the 79.3% and 9.6% of the variance, respectively. The samples obtained at  $t = 0$  h and  $t = 4$  h after the intake of an isocaloric beverage (IB) and the samples obtained at  $t = 0$  h and  $t = 4$  h after orange intake are colored in green, blue, black and orange, respectively.

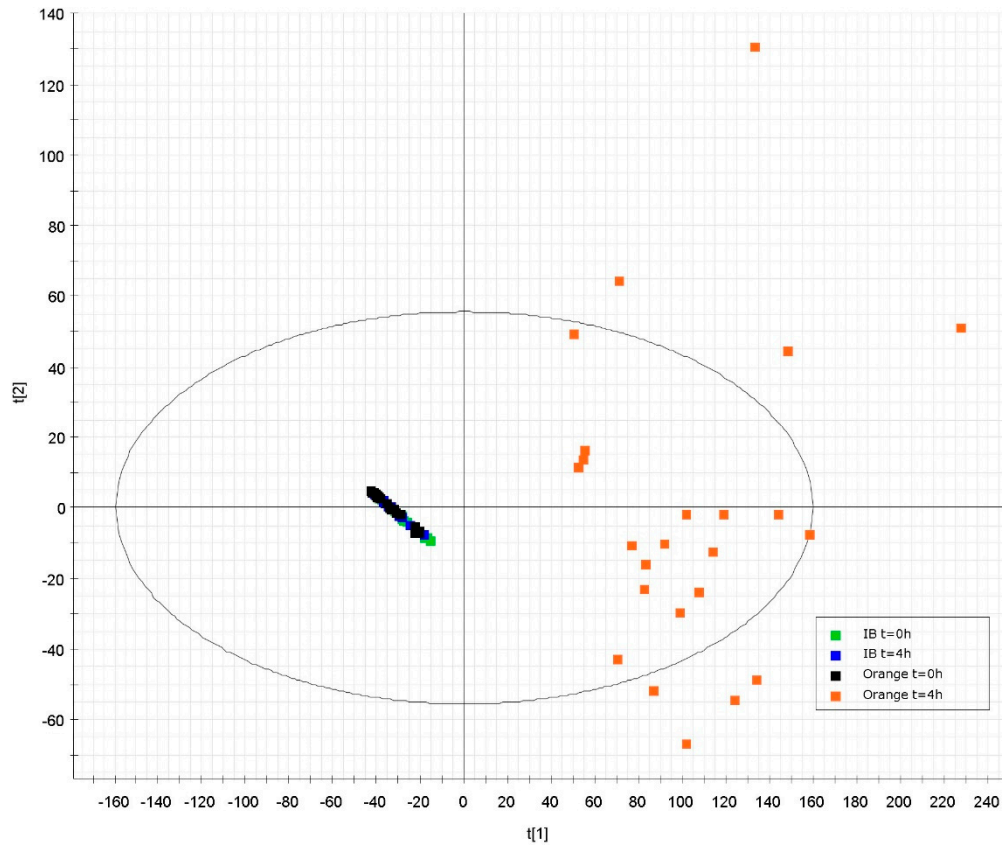

**Figure S6.** Extraction ion chromatograms of ions present in the LE function of HILIC pos and HILIC neg analysis. The experimental RT and CCS are shown.

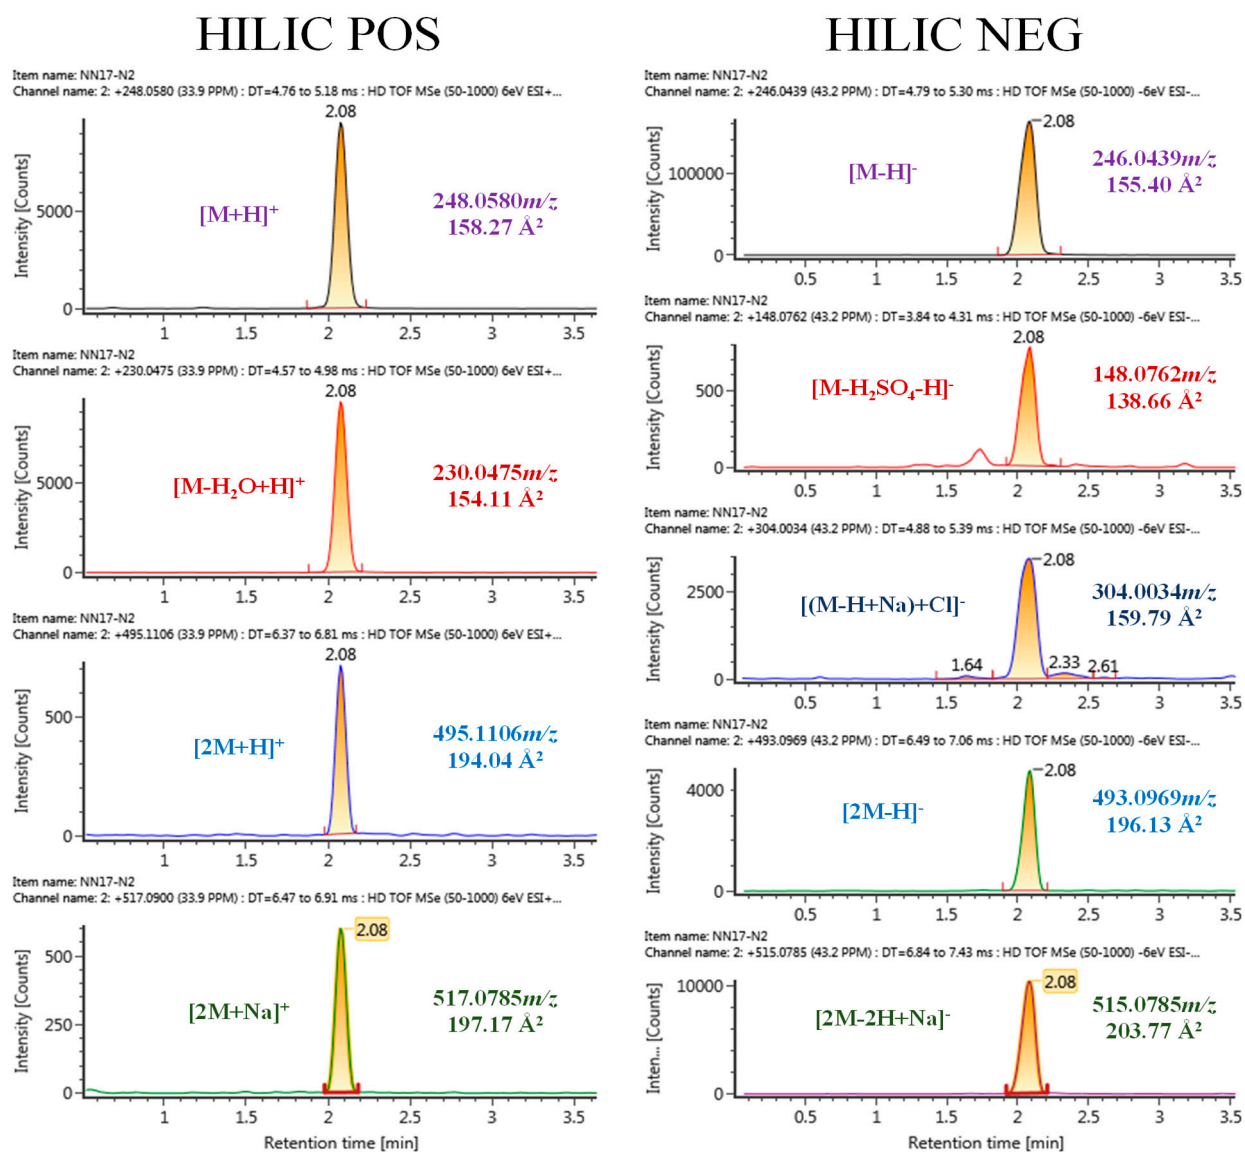

Supplement: nutrients-12-01916-s001.pdf [file nutrients-12-01916-s001.pdf]
